# Supplementary material for: Nitrogen and phosphorus co-doped carbon modified activated carbon as an efficient oxygen reduction catalyst for microbial fuel cells
Source: Royal Society of Chemistry journal article supplement (doi:10.1039/c7ra12907f), 2018-01-01
Supplement: c7ra12907f1.pdf [file c7ra12907f1.pdf]

## Nitrogen and Phosphorus co-doped Carbon Modified Activated Carbon as Efficient Oxygen Reduction Catalysts for Microbial Fuel Cells

Kang Lv, Hua Zhang and Shuiliang Chen\*

Department of Chemistry and Chemical Engineering, Jiangxi Normal University, 330022 Nanchang, China. E-mail: [slchenjxnu@jxnu.edu.cn](mailto:slchenjxnu@jxnu.edu.cn)

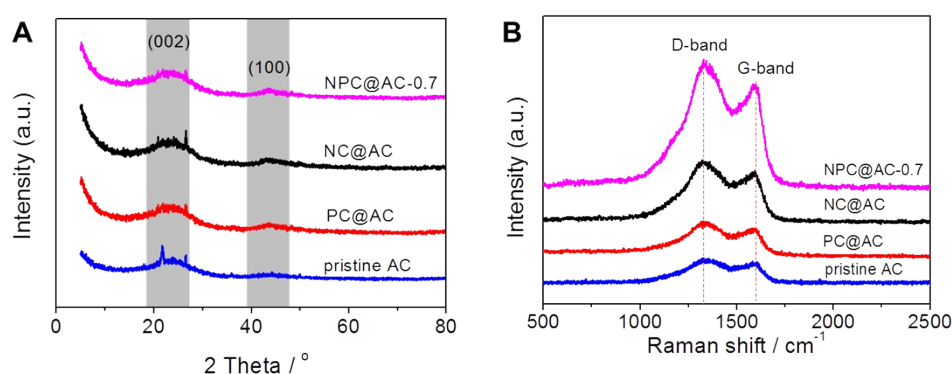

**Fig. S1.** (A) XRD patterns and (B) Raman spectra of the NPC@AC-0.7, NC@AC, PC@AC and pristine AC.

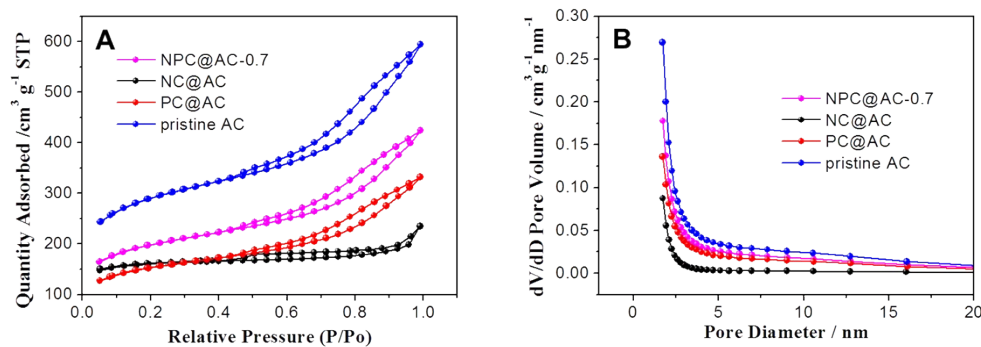

**Fig. S2.** (A) N<sub>2</sub> adsorption–desorption isotherms and (B) pore size distributions of the NPC@AC-0.7, NC@AC, PC@AC and pristine AC, respectively.
